# Supplementary material
Source: publisher figshare collection journal article supplement (https://frontiersin.figshare.com/ndownloader/files/34512779)
Supplement: Supplementary file 1 [file 34512779]

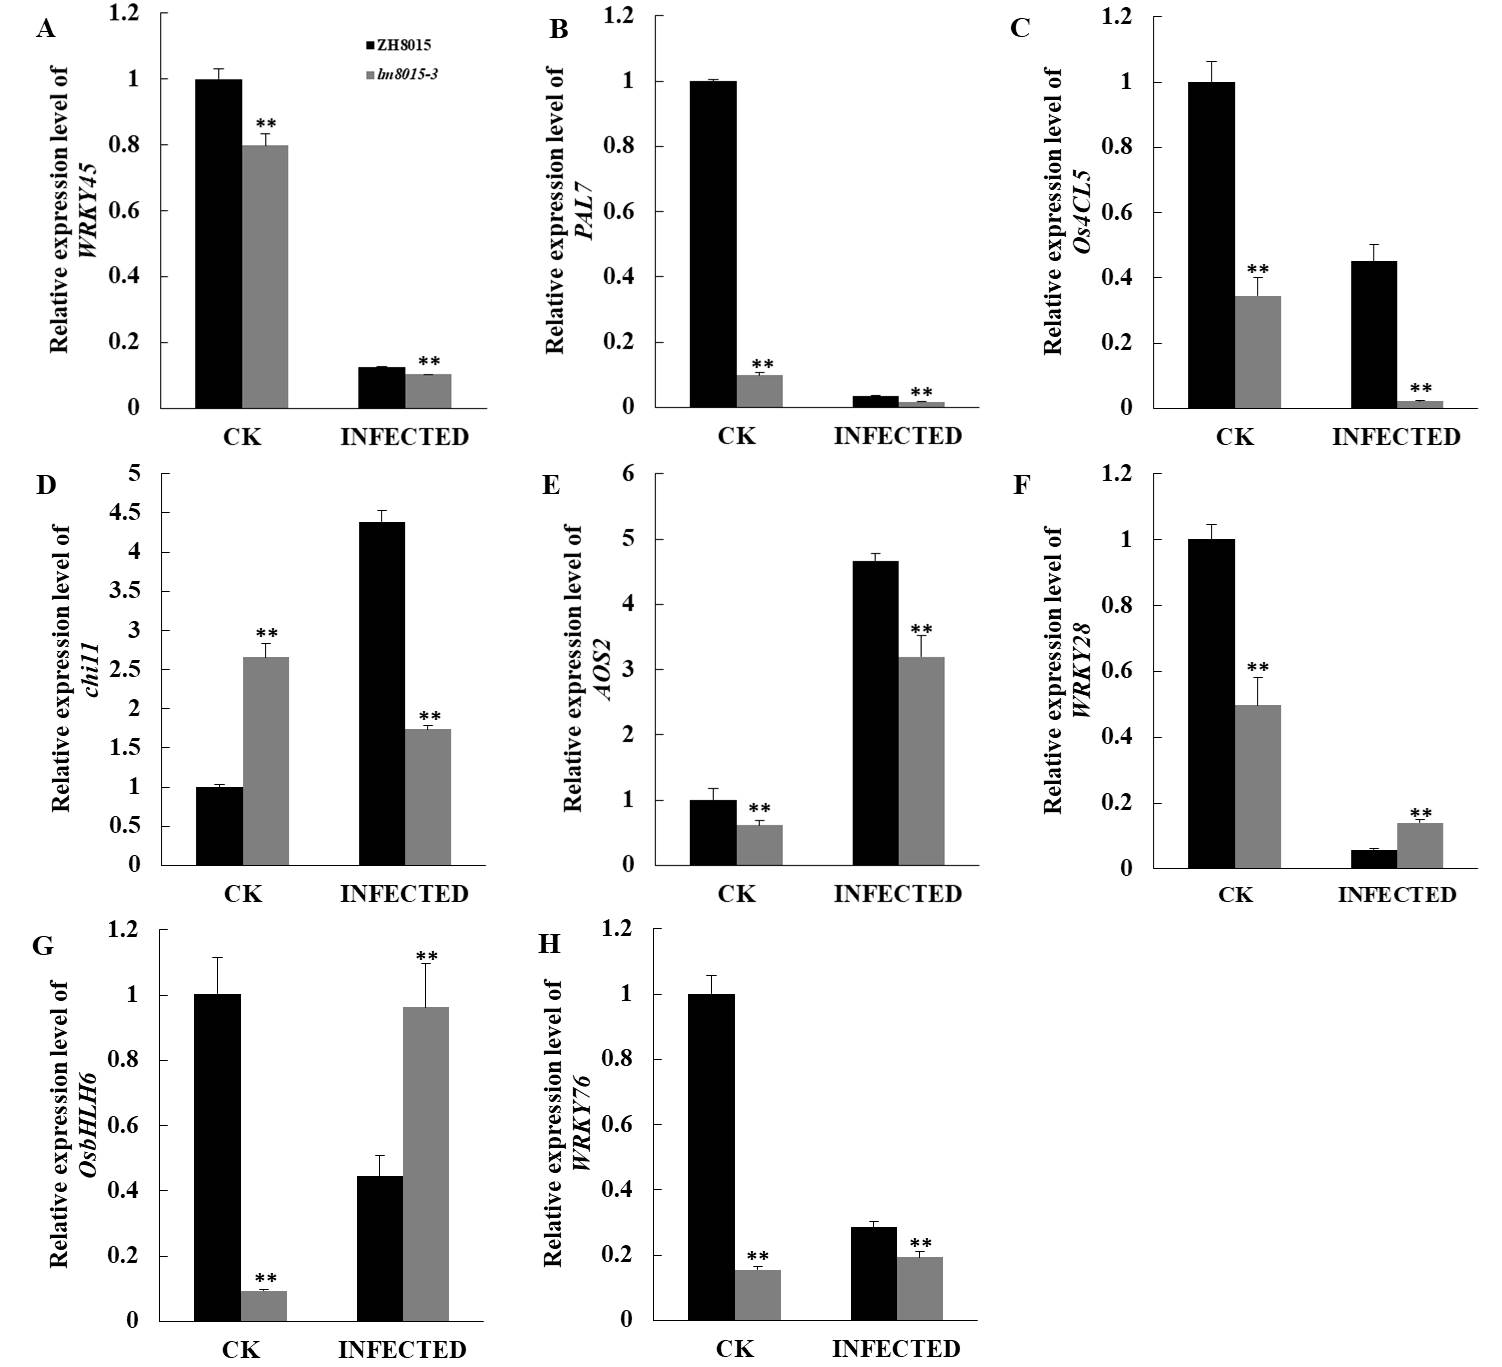


Fig S1 Relative expression analysis of defense genes of *lm8015-3* after inoculation at 72 h

A-H: The relative expression analysis of different defense genes of three-week-oldZH8015 and *lm8015-3* after inoculation at 72 h. "CK" stands for the leaves without the injection of *M. Oryzae*; "INJECTED" stands for the leaves with the injection of *M*. *Oryzae*. **Significant at *P*<0.01(*t*-test); Error bars represent SD (n=3).
